# Supplementary material for: The Urinary Tract Microbiome in Male Genitourinary Diseases: Focusing on Benign Prostate Hyperplasia and Lower Urinary Tract Symptoms
Source: PubMed Central journal article supplement — Int Neurourol J. 2021 Jan 19;25(1):3–11. doi: 10.5213/inj.2040174.087 (PMC8022174; doi:10.5213/inj.2040174.087), 2021-01-19
Supplement: inj-2040174-087-suppl.pdf [file inj-2040174-087-suppl.pdf]

**Supplementary Table 1.** Urinary microbiome in patients with STI [24]

| Control individuals                        | Main bacterial taxa found in controls                                                                                                                                                                                                                                                                                    | Patients                                | Main bacterial taxa found in patients                                                                                                                                                                                                                                                                                       | Sample collection | Technique used | Reference                 |
|--------------------------------------------|--------------------------------------------------------------------------------------------------------------------------------------------------------------------------------------------------------------------------------------------------------------------------------------------------------------------------|-----------------------------------------|-----------------------------------------------------------------------------------------------------------------------------------------------------------------------------------------------------------------------------------------------------------------------------------------------------------------------------|-------------------|----------------|---------------------------|
| Men aged $\geq 18$ yr without STI (n = 9)  | <i>Corynebacterium</i> , <i>Lactobacillus</i> , <i>Streptococcus</i> , <i>Staphylococcus</i> , <i>Propionibacterium</i>                                                                                                                                                                                                  | Men aged $\geq 18$ yr with STI (n = 10) | <i>Sneathia</i> , <i>Prevotella</i> , <i>Gemella</i> , <i>Aerococcus</i> , <i>Lactobacillus</i> , <i>Streptococcus</i> , <i>Veillonella</i> , <i>Anaerococcus</i> , <i>Atopobium</i> , <i>Corynebacterium</i> , <i>Mycoplasma</i>                                                                                           | First-void urine  | 16S rRNA GS    | Nelson et al. (2010) [25] |
| Men aged $\geq 18$ yr without STI (n = 22) | <i>Lactobacillus</i> , <i>Sneathia</i> , <i>Veillonella</i> , <i>Corynebacterium</i> , <i>Prevotella</i> , <i>Streptococcus</i> , <i>Ureaplasma</i> , <i>Mycoplasma</i> , <i>Anaerococcus</i> , <i>Atopobium</i> , <i>Aerococcus</i> , <i>Staphylococcus</i> , <i>Gemella</i> , <i>Enterococcus</i> , <i>Finnegoldia</i> | Men aged $\geq 18$ yr with STI (n = 10) | <i>Neisseria</i> , <i>Streptococcus</i> , <i>Corynebacterium</i> , <i>Prevotella</i> , <i>Ureaplasma</i> , <i>Lactobacillus</i> , <i>Aerococcus</i> , <i>Gemella</i> , <i>Sneathia</i> , <i>Veillonella</i> , <i>Staphylococcus</i> , <i>Propionibacterium</i> , <i>Mycoplasma</i> , <i>Ralstonia</i> , <i>Anaerococcus</i> | First-void urine  | 16S rRNA GS    | Dong et al. (2011) [27]   |

STI, sexually transmitted infection; GS, gene sequencing.
